# Supplementary material for: Highly selective iodide-responsive gel–sol state transition in supramolecular hydrogels
Source: Royal Society of Chemistry journal article supplement (doi:10.1039/b908755a), 2009-01-01
Supplement: b908755a.pdf [file b908755a.pdf]

## **Highly selective iodide-responsive gel-sol state transition in supramolecular hydrogels**

Jiang-Shan Shen, Dong-Hua Li, Qing-Guo Cai and Yun-Bao Jiang\*

*Department of Chemistry, College of Chemistry and Chemical Engineering, and the  
MOE Key Laboratory of Analytical Sciences, Xiamen University, Xiamen 361005,  
China*

*Fax: (+86)592-218-5662; Tel: (+86)592-218-5662; E-mail: ybjjiang@xmu.edu.cn*

**Electronic Supplementary Information (ESI)**

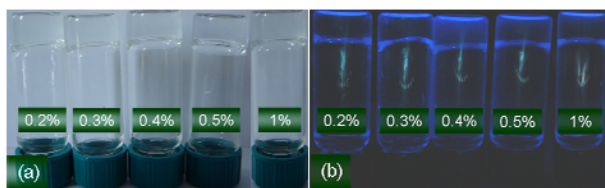

**Fig. S1** Photos of the hydrogels of varying Ag(I)-GSH content (wt) under (a) room light and (b) 354 nm UV-light

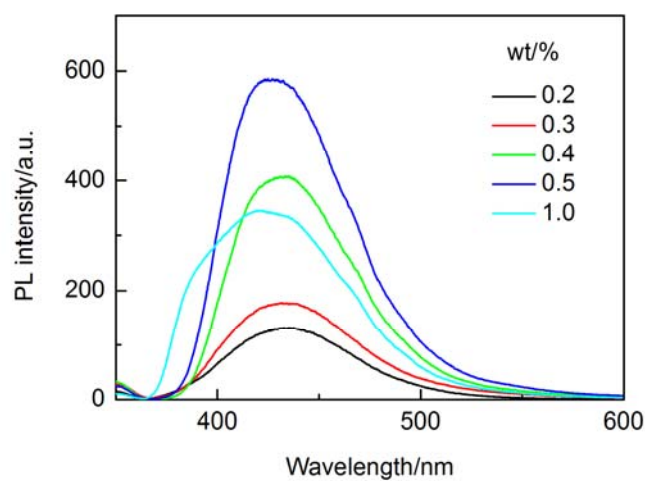

**Fig. S2** PL spectra of hydrogels of varying Ag(I)-GSH content (wt).  $\lambda_{\text{ex}} = 350$  nm.

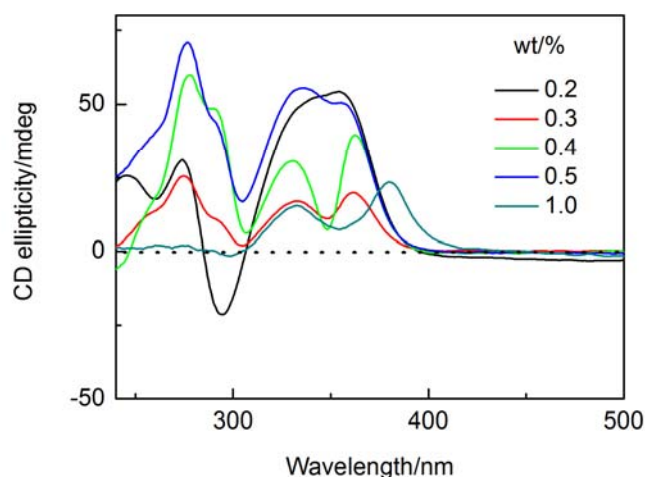

**Fig. S3** CD spectra of hydrogels of varying Ag(I)-GSH content (wt)

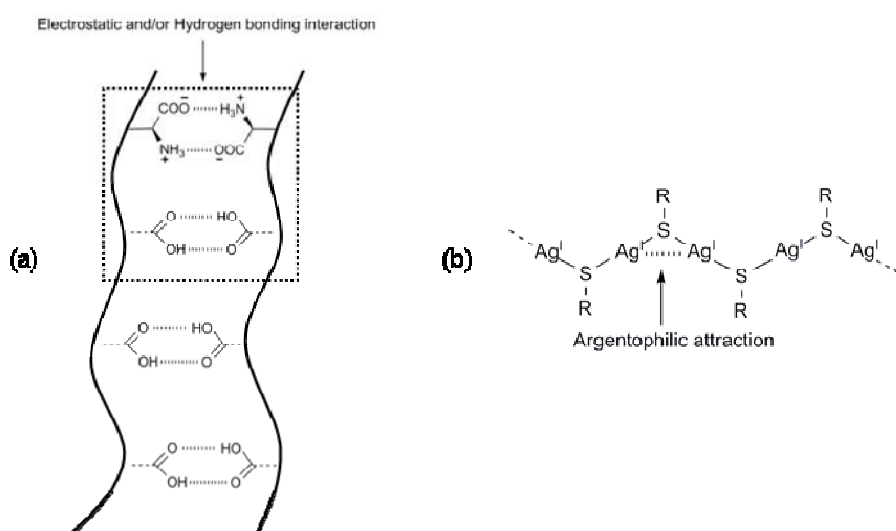

**Fig. S4** Illustration of synergistic interactions involving metallophilic attraction, electrostatic interaction, and/or hydrogen bonding in Ag(I)-GSH hydrogel. This was suggested responsible for gelation. (a) Hydrogen bonding and/or electrostatic interaction between polymeric chains. It should be noted that the isoelectric point of GSH is 3.8 and pH of the hydrogels is *ca.* 2, electrostatic interaction, and/or hydrogen bonding between polymeric chains can therefore be reasonably suggested.<sup>1</sup> (b) Argentophilic attraction between neighboring Ag(I)s in coordination polymeric backbone.

I. I. S. Lim, D. Mott, W. Ip, P. N. Njoki, Y. Pan, S. Zhou and C. -J. Zhong, *Langmuir*, 2008, **24**, 8857-8863; A. Kühnle, T. R. Linderoth, B. Hammer and F. Besenbacher, *Nature*, 2002, **415**, 891-893; I-I. S. Lim, D. Mott, M. H. Engelhard, Y. Pan, S. Kamodia, J. Luo, P. N. Njoki, S. Zhou, L. Wang and C. J. Zhong, *Anal. Chem.*, 2009, **81**, 689-698; S. I. Lim and C. -J. Zhong, *Acc. Chem. Res.*, 2009, doi:10.1021/ar8002688.

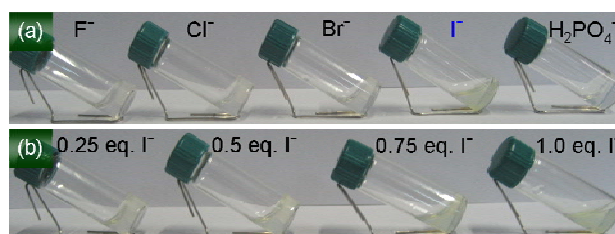

**Fig. S5** (a) Visual observation of response of Ag(I)-GSH hydrogel to various anions (1 eq.) and (b) gel-sol state transition of Ag(I)-GSH hydrogel triggered by 0.25, 0.5, 0.75, and 1.0 eq. I<sup>-</sup>. The employed hydrogel contained 0.5 % Ag(I)-GSH (wt).

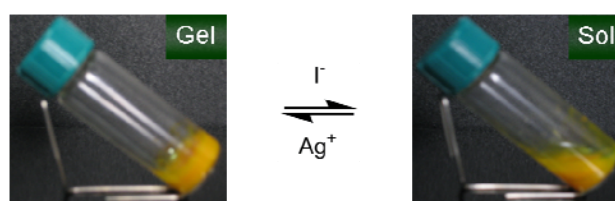

**Fig. S6** Visual observation of reversible gel-sol state transition of the hydrogel containing 0.5 % Ag(I)-GSH (wt) in a colored and fluorescent background containing fluorescein by alternately adding 1 eq. I<sup>-</sup> into hydrogel and 1 eq. Ag(I) into the resulting sol solution

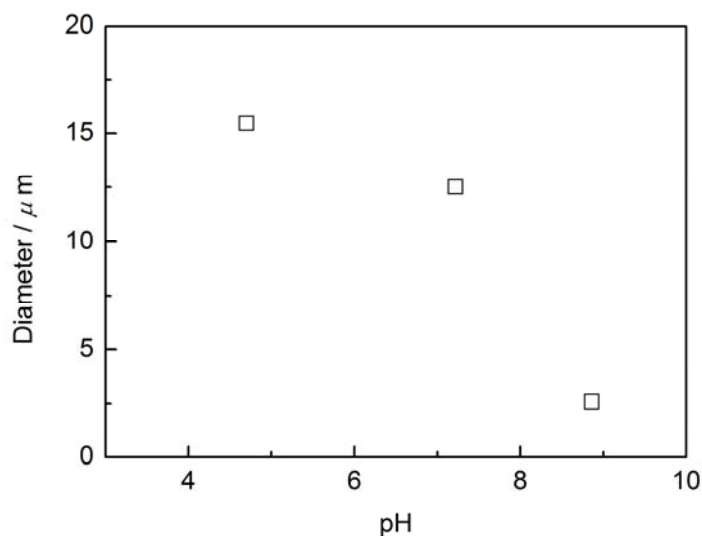

**Fig. S7** Mean hydrodynamic diameter ( $D_h$ ) of Ag(I)-GSH bulk solution ( $75 \mu\text{M}$ ) under different pH obtained from dynamic light scattering (DLS) measurements. Results indicated that electrostatic repulsion between Ag(I)-GSH polymeric chains occurred at high pH.

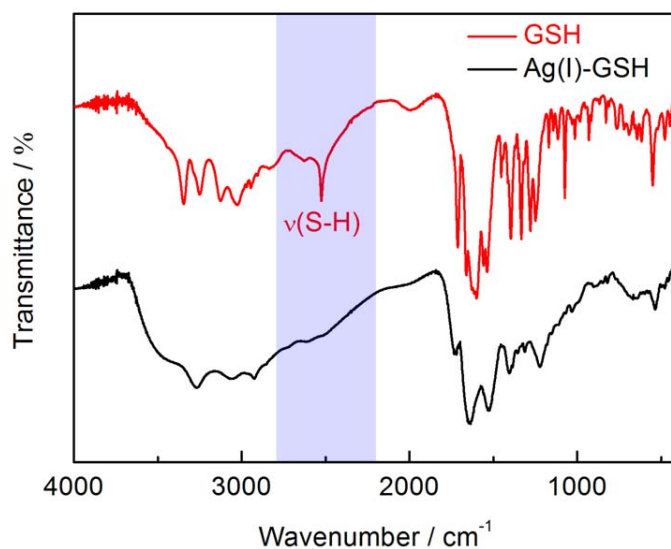

**Fig. S8** IR spectra of GSH (red) and Ag(I)-GSH xerogel (black) in KBr pellet. IR data clearly indicated that the prominent stretching band of S-H of GSH at  $2555 \text{cm}^{-1}$  disappeared in Ag(I)-GSH xerogel, in agreement with the formation of Ag(I)-thiolate. Both IR and DLS data pointed to the formation of Ag(I)-GSH structural unit.
